# Supplementary material for: Comparison of the Pig Breeds in the Small Intestinal Morphology and Digestive Functions at Different Ages
Source: MDPI journal article supplement (doi:10.3390/metabo13010132), 2023-01-15
Supplement: s1 [file s1]

**Supplementary Table S1.** Primer sequences of the target genes

| Target Genes   | Accession No.  | Primer Sequences (5'-3')                               |
|----------------|----------------|--------------------------------------------------------|
| <i>FABP1</i>   | NM_001004046.2 | F: TGAACCTCAACGGTGACATA<br>R: ATTCTCTTGCTGATTCTCTTG    |
| <i>FABP2</i>   | NM_001031780.1 | F: CAGCCTCGCAGACGGAAGTGA<br>R: GTGTTCTGGGCTGTGCTCCAAGA |
| <i>FABP4</i>   | NM_001002817.1 | F: TGGAACCTTGTCTCCAGTG<br>R: GGTACTTTCTGATCTAATGGTG    |
| <i>GAPDH</i>   | NM_001206359.1 | F: CAGCAATGCCTCCTGTACCA<br>R: ACGATGCCGAAGTTGTTCATG    |
| <i>GLUT1</i>   | XM_003482115.1 | F: TGCTCATCAACCGCAATGA<br>R: GTTCCGCGCAGCTTCTTC        |
| <i>GLUT2</i>   | NM_001097417.1 | F: CCAGGCCCATCCCCTGGTT<br>R: GCGGGTCCAGTTGCTGAATGC     |
| <i>GLUT5</i>   | XM_021095282.1 | F: CCCAGGAGCCGGTCAAG<br>R: TCAGCGTCGCCAAAGCA           |
| <i>PEPT1</i>   | NM_214347.1    | F: GGATAGCCTGTACCCCAAGCT<br>R: CATCCTCCACGTGCTTCTTGA   |
| <i>SGLT1</i>   | NM_001164021.1 | F: GGCTGGACGAAGTATGGTG<br>R: ACAACCACCCAAATCAGAGC      |
| <i>SLC1A1</i>  | NM_001164649.1 | F: GGCACCGCACTCTACGAAGCA<br>R: GCCCACGGCACTTAGCACGA    |
| <i>SLC7A7</i>  | NM_001110421.1 | F: TCAAGTGGGGAACCCTGGTA<br>R: ATGGAGAGGGGCAGATTCCT     |
| <i>SLC6A19</i> | XM_003359855.4 | F: TCTGTCCACAACAAGTGCAG<br>R: CAGCGAAGTTCTCCTGCGTC     |

*GLUT*, glucose transporter; *SGLT1*, sodium-glucose linked transporter 1; *PEPT1*, peptide transporter 1; *SLC1A1*, solute carrier family 1 member 1; *SLC7A7*, solute carrier family 7 member 7; *SLC6A19*, sodium-dependent neutral amino acid transporter; *SLC1A5*, solute carrier family 1 member 5; *SLC7A9*, solute carrier family 7 member 9; *FABP*, fatty acid binding protein.
